# Supplementary material for: Complex soil food web enhances the association between N mineralization and soybean yield – a model study from long-term application of a conservation tillage system in a black soil of Northeast China
Source: Copernicus journal article supplement (doi:10.5194/soil-7-71-2021), 2021-03-19
Supplement: Supplementary file 1 [file soil-7-71-2021-supplement.pdf]

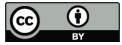

*Supplement of*

**Complex soil food web enhances the association between N mineralization and soybean yield – a model study from long-term application of a conservation tillage system in a black soil of Northeast China**

**Shixiu Zhang et al.**

*Correspondence to:* Haitao Wu ([wuhaitao@iga.ac.cn](mailto:wuhaitao@iga.ac.cn)) and Aizhen Liang ([liangaizhen@iga.ac.cn](mailto:liangaizhen@iga.ac.cn))

The copyright of individual parts of the supplement might differ from the article licence.

1

2 **Table S1** Soil bulk density ( $\text{g cm}^{-3}$ ) under different tillage practices during the  
3 growing season of soybean.

|         |           | Soil bulk density ( $\text{g cm}^{-3}$ ) |                |                |                |                |                |                   |
|---------|-----------|------------------------------------------|----------------|----------------|----------------|----------------|----------------|-------------------|
|         | Treatment | April                                    | May            | June           | July           | August         | September      | Mean              |
| 0–5 cm  | CT        | 1.06<br>(0.07)                           | 1.08<br>(0.02) | 1.15<br>(0.04) | 1.25<br>(0.02) | 1.36<br>(0.05) | 1.42<br>(0.03) | 1.22 a<br>(0.10)  |
|         | RT        | 1.00<br>(0.04)                           | 1.05<br>(0.02) | 1.10<br>(0.04) | 1.16<br>(0.05) | 1.22<br>(0.06) | 1.27<br>(0.02) | 1.13 b<br>(0.09)  |
|         | NT        | 0.96<br>(0.05)                           | 1.09<br>(0.03) | 1.11<br>(0.03) | 1.19<br>(0.05) | 1.23<br>(0.06) | 1.28<br>(0.01) | 1.14 b<br>(0.11)  |
| 5–15 cm | CT        | 1.11<br>(0.08)                           | 1.13<br>(0.07) | 1.14<br>(0.07) | 1.22<br>(0.05) | 1.30<br>(0.04) | 1.30<br>(0.01) | 1.20 b<br>(0.09)  |
|         | RT        | 1.23<br>(0.01)                           | 1.25<br>(0.01) | 1.26<br>(0.02) | 1.33<br>(0.01) | 1.38<br>(0.02) | 1.40<br>(0.02) | 1.31 ab<br>(0.07) |
|         | NT        | 1.27<br>(0.03)                           | 1.32<br>(0.05) | 1.30<br>(0.03) | 1.37<br>(0.04) | 1.42<br>(0.03) | 1.42<br>(0.02) | 1.35 a<br>(0.06)  |

4 CT, conventional tillage; RT, reduced tillage; NT, no tillage.

**Table S2** Nematode taxa identified from different tillage practices across sampling dates and soil depths.

| <b>Bacterivores</b>    | <b>Fungivores</b>     | <b>Plant parasites</b> | <b>Omnivores-predators</b> |
|------------------------|-----------------------|------------------------|----------------------------|
| <i>Acrobeles</i>       | <i>Aphelenchoides</i> | <i>Amplimerlinius</i>  | <i>Bathyodontus</i>        |
| <i>Acrobeloides</i>    | <i>Aphelenchus</i>    | <i>Axonchium</i>       | <i>Clarkus</i>             |
| <i>Alaimus</i>         | <i>Diphtherophora</i> | <i>Basiria</i>         | <i>Discolaimus</i>         |
| <i>Cephalobus</i>      | <i>Filenchus</i>      | <i>Boleodorus</i>      | <i>Dorydorella</i>         |
| <i>Cervidellus</i>     | <i>Paraphelenchus</i> | <i>Cephalenchus</i>    | <i>Enchodelus</i>          |
| <i>Chiloplacus</i>     | <i>Tylencholaimus</i> | <i>Coslenchus</i>      | <i>Epidorylaimus</i>       |
| <i>Diplogasteritus</i> |                       | <i>Helicotylenchus</i> | <i>Eudorylaimus</i>        |
| <i>Domorganus</i>      |                       | <i>Heterodera</i>      | <i>Laimydorus</i>          |
| <i>Plectus</i>         |                       | <i>Longidorus</i>      | <i>Mesodorylaimus</i>      |
| <i>Prismatolaimus</i>  |                       | <i>Macroposthonia</i>  | <i>Microdorylaimus</i>     |
| <i>Rhabditis</i>       |                       | <i>Malenchus</i>       | <i>Prodorylaimus</i>       |
| <i>Teratocephalus</i>  |                       | <i>Neopsilenchus</i>   | <i>Pungentus</i>           |
| <i>Tylopharynx</i>     |                       | <i>Ogma</i>            | <i>Sectonema*</i>          |
|                        |                       | <i>Paratylenchus</i>   | <i>Thonus</i>              |
|                        |                       | <i>Pratylenchus</i>    |                            |
|                        |                       | <i>Psilenchus</i>      |                            |
|                        |                       | <i>Rotylenchus</i>     |                            |
|                        |                       | <i>Tylenchus</i>       |                            |
|                        |                       | <i>Xiphinema*</i>      |                            |

\* represents nematode genus only present in 5-15 cm depth across different tillage practices and sampling dates.

**Table S3** Soil meso-faunal taxa identified from different tillage practices across sampling dates and soil depths.

|              | <b>Feeding type</b> | <b>Groups</b>       | <b>Species</b>                                                                                                                                      |
|--------------|---------------------|---------------------|-----------------------------------------------------------------------------------------------------------------------------------------------------|
| Mites        | Fungivores          | Oribatida mites     | <i>Ramusella sengbuschi</i><br><i>Macquarioppia sp.1</i>                                                                                            |
|              | Fungivores          | Prostigmatic mites  | <i>Bdella sp.1</i>                                                                                                                                  |
|              | Predators           | Mesostigmatid mites | <i>Hypoaspis sp.1</i><br><i>Sejidae. sp.</i>                                                                                                        |
|              |                     |                     |                                                                                                                                                     |
| Collembolans | Fungivores          | Onychiuridae        | <i>Protaphorura armata</i><br><i>Allonychiurus songi</i>                                                                                            |
|              | Omnivorous          | Others              | <i>Tomocerus nigrus</i><br><i>Orchesellides sinensis</i><br><i>Lepidocyrtus felipei</i><br><i>Isotomiella minor</i><br><i>Homidia phjongiangica</i> |
|              |                     |                     |                                                                                                                                                     |
|              |                     |                     |                                                                                                                                                     |
|              |                     |                     |                                                                                                                                                     |

**Table S4** Mean abundance (expressed as individuals m<sup>-2</sup>) of the identified taxa of soil fauna under different tillage practices over the soybean growing season (means (SD)).

|                     | Feeding guild       | 0-5 cm            |                   |                    | 5-15 cm           |                   |                    | ANOVA       |           |         |
|---------------------|---------------------|-------------------|-------------------|--------------------|-------------------|-------------------|--------------------|-------------|-----------|---------|
|                     |                     | CT                | RT                | NT                 | CT                | RT                | NT                 | Tillage (T) | Depth (D) | T × D   |
| <b>Nematodes</b>    | Bacterivores        | 51794<br>(10904)  | 89847<br>(10974)  | 102695<br>(36194)  | 46811<br>(10247)  | 75334<br>(4121)   | 117392<br>(14001)  | < 0.001     | ns        | ns      |
|                     | Fungivores          | 54021<br>(5000) a | 30789<br>(3607) b | 38990<br>(6748) ab | 46818<br>(8791) b | 47414<br>(3947) b | 76095<br>(14462) a | 0.004       | 0.001     | 0.001   |
|                     | Plant parasites     | 52889<br>(5930)   | 69762<br>(20981)  | 85470<br>(13180)   | 90778<br>(18486)  | 100303<br>(18842) | 111569<br>(19820)  | 0.02        | < 0.001   | ns      |
|                     | Omnivores-predators | 12562<br>(2251) a | 11004<br>(6940) a | 13250<br>(4256) a  | 24644<br>(4556) b | 32689<br>(6011) b | 68449<br>(9515) a  | < 0.001     | < 0.001   | < 0.001 |
| <b>Mites</b>        | Fungivores          | 5746<br>(1271)    | 11558<br>(3803)   | 13101<br>(4404)    | 2731<br>(201)     | 4294<br>(674)     | 3631<br>(1797)     | 0.008       | < 0.001   | ns      |
|                     | Predators           | 341<br>(70)       | 680<br>(388)      | 860<br>(401)       | 169<br>(114)      | 189<br>(105)      | 158<br>(205)       | ns          | < 0.001   | ns      |
| <b>Collembolans</b> | Fungivores          | 2480<br>(1831)    | 3989<br>(2384)    | 4133<br>(1517)     | 1159<br>(91)      | 1543<br>(668)     | 1606<br>(599)      | ns          | 0.002     | ns      |
|                     | Omnivores           | 1546<br>(464)     | 2322<br>(744)     | 2071<br>(589)      | 565<br>(387)      | 744<br>(547)      | 689<br>(188)       | 0.040       | 0.001     | ns      |

CT, conventional tillage; RT, reduced tillage; NT, no tillage; two-way ANOVA was used to test the effect of tillage and soil depth on the variables. When significant interaction occurred, the pairwise differences between CT and RT and NT were tested with Tukey's honestly significant difference at each soil depth; ns indicates no significant difference ( $P > 0.05$ ); same lowercase letter in the same row and same depth indicates no significant difference among tillage systems ( $P > 0.05$ ).

**Table S5** The density independent feeding preference<sup>1</sup> for each predator trophic group.

| Predator trophic group          | Prey trophic groups             | Density independent feeding preference |
|---------------------------------|---------------------------------|----------------------------------------|
| Bacteria                        | Detritus                        | 1                                      |
| Fungi                           | Detritus                        | 1                                      |
| Herbivorous nematodes           | Root                            | 1                                      |
| Herbivorous collembolans        | Root                            | 1                                      |
| Bacterivorous nematodes         | Bacteria                        | 0.95                                   |
| Bacterivorous collembolans      | Bacteria                        | 1                                      |
| Fungivorous nematodes           | Fungi                           | 0.8                                    |
| Fungivorous collembolans        | Fungi                           | 0.95                                   |
| Fungivorous mites               | Fungi                           | 1                                      |
| Omnivorous-predaceous nematodes | Herbivorous nematodes           | 0.2                                    |
|                                 | Bacterivorous nematodes         | 0.2                                    |
|                                 | Fungivorous nematodes           | 0.2                                    |
| Predaceous collembolans         | Herbivorous nematodes           | 0.05                                   |
|                                 | Bacterivorous nematodes         | 0.05                                   |
|                                 | Fungivorous nematodes           | 0.05                                   |
|                                 | Omnivorous-predaceous nematodes | 0.8                                    |
|                                 | Herbivorous collembolans        | 0.05                                   |
|                                 | Bacterivorous collembolans      | 0.05                                   |
|                                 | Fungivorous collembolans        | 0.05                                   |
| Predaceous mites                | Herbivorous nematodes           | 0.1                                    |
|                                 | Bacterivorous nematodes         | 0.1                                    |
|                                 | Fungivorous nematodes           | 0.1                                    |
|                                 | Omnivorous-predaceous nematodes | 0.1                                    |
|                                 | Fungivorous mites               | 0.2                                    |
|                                 | Herbivorous collembolans        | 0.2                                    |
|                                 | Bacterivorous collembolans      | 0.2                                    |
|                                 | Fungivorous collembolans        | 0.2                                    |
|                                 | Predaceous collembolans         | 0.2                                    |

<sup>1</sup>, source from de Ruiter et al. (1993), de Vries et al., (2013), Didden et al. (1994) and Schwarz et al. (2017).

**Table S6** Values of the physiological parameters<sup>1</sup> used to calculate the N of the soil food web.

| Trophic groups                  | C:N | Assimilation efficiency | Production efficiency | Death rate (year <sup>-1</sup> ) |
|---------------------------------|-----|-------------------------|-----------------------|----------------------------------|
| Root <sup>2</sup>               | 7.5 | -                       | -                     | -                                |
| Detritus <sup>3</sup>           | 12  |                         |                       |                                  |
| Bacteria                        | 5   | 1.00                    | 0.30                  | 9                                |
| Fungi                           | 10  | 1.00                    | 0.44                  | 3.7                              |
| Herbivorous nematodes           | 10  | 0.42                    | 0.31                  | 2.3                              |
| Herbivorous collembolans        | 8   | 0.34                    | 0.37                  | 1.96                             |
| Bacterivorous nematodes         | 10  | 0.54                    | 0.49                  | 14.1                             |
| Bacterivorous collembolans      | 8   | 0.34                    | 0.37                  | 1.96                             |
| Fungivorous nematodes           | 10  | 0.42                    | 0.31                  | 6                                |
| Fungivorous collembolans        | 8   | 0.34                    | 0.37                  | 1.96                             |
| Fungivorous mites               | 8   | 0.50                    | 0.40                  | 1.42                             |
| Omnivorous-predaceous nematodes | 10  | 0.55                    | 0.28                  | 5.8                              |
| Predaceous collembolans         | 8   | 0.34                    | 0.37                  | 1.96                             |
| Predaceous mites                | 8   | 0.75                    | 0.30                  | 3.44                             |

<sup>1</sup>, source from de Vries et al. (2013); <sup>2</sup>, the C:N ratio of the cytoplasm of plant cells (Verschoor et al., 2002); <sup>3</sup>, the C:N ratio of detritus measured in our lab.

1 **Table S7** The cumulative amount of mineral N delivered by soil food webs (expressed as mg N m<sup>-2</sup> year<sup>-1</sup>) over the soybean growing season  
 2 under different tillage practices (means (SD)).

| Pathway           | Feeding guild                 | 0-5 cm              |                     |                      | 5-15 cm             |                     |                     | ANOVA       |           |       |
|-------------------|-------------------------------|---------------------|---------------------|----------------------|---------------------|---------------------|---------------------|-------------|-----------|-------|
|                   |                               | CT                  | RT                  | NT                   | CT                  | RT                  | NT                  | Tillage (T) | Depth (D) | T × D |
| Root pathway      | Total Nmin                    | 52.55 c<br>(2.80)   | 63.30 b<br>(3.28)   | 75.95 a<br>(4.76)    | 140.50 a<br>(27.74) | 118.40 a<br>(7.21)  | 159.77 a<br>(23.46) | < 0.001     | < 0.001   | 0.020 |
|                   | Nmin (roots→herbivores)       | 41.69<br>(3.25)     | 53.16<br>(2.69)     | 61.6<br>(3.19)       | 72.29<br>(7.72)     | 77.35<br>(4.38)     | 86.09<br>(12.00)    | < 0.001     | < 0.001   | ns    |
|                   | Nmin (herbivores→predators)   | 10.85<br>(2.40)     | 10.15<br>(0.78)     | 14.30<br>(2.22)      | 68.21<br>(20.22)    | 41.04<br>(8.95)     | 73.68<br>(13.67)    | 0.003       | < 0.001   | ns    |
| Bacterial pathway | Total Nmin                    | 4517.74<br>(353.44) | 5855.59<br>(307.55) | 6425.15<br>(916.86)  | 6550.21<br>(970.00) | 8830.57<br>(145.38) | 9565.72<br>(438.29) | < 0.001     | < 0.001   | ns    |
|                   | Nmin (detritus→bacteria)      | 4271.71<br>(349.71) | 5205.55<br>(257.29) | 5951.09<br>(822.55)  | 6314.26<br>(954.98) | 8457.56<br>(103.94) | 8979.14<br>(512.34) | < 0.001     | < 0.001   | ns    |
|                   | Nmin (bacteria→bacterivores)  | 225.41 b<br>(30.23) | 622.04 a<br>(46.52) | 449.51 a<br>(133.83) | 186.04 c<br>(40.46) | 296.38 b<br>(36.76) | 428.84 a<br>(47.20) | < 0.001     | < 0.001   | 0.002 |
|                   | Nmin (bacterivores→predators) | 20.62 a<br>(3.70)   | 24.54 a<br>(10.27)  | 28.00 a<br>(2.52)    | 49.91 b<br>(11.11)  | 76.64 ab<br>(20.63) | 157.71 a<br>(74.42) | 0.002       | < 0.001   | 0.013 |
| Fungal pathway    | Total Nmin                    | 5447.57<br>(436.59) | 7434.05<br>(551.69) | 7646.12<br>(794.07)  | 6537.00<br>(302.66) | 7949.78<br>(990.23) | 8468.86<br>(313.37) | < 0.001     | 0.007     | ns    |
|                   | Nmin (detritus→fungi)         | 5421.75<br>(433.21) | 7402.99<br>(542.76) | 7613.55<br>(798.64)  | 6509.06<br>(299.44) | 7919.58<br>(521.04) | 8414.91<br>(325.48) | < 0.001     | 0.007     | ns    |
|                   | Nmin (fungi→fungivores)       | 20.09               | 25.49               | 26.74                | 17.32               | 21.53               | 29.44               | 0.003       | ns        | ns    |



|                                            |          |          |           |           |           |          |         |         |    |
|--------------------------------------------|----------|----------|-----------|-----------|-----------|----------|---------|---------|----|
|                                            | (4.24)   | (6.92)   | (4.11)    | (1.00)    | (4.57)    | (4.25)   |         |         |    |
| Nmin (fungivores→predators)                | 5.72     | 5.57     | 5.83      | 10.61     | 8.68      | 24.52    | 0.034   | < 0.001 | ns |
|                                            | (2.13)   | (2.58)   | (2.13)    | (3.99)    | (3.83)    | (10.89)  |         |         |    |
| <b>Total mineralized N in the food web</b> | 10017.85 | 13352.94 | 14147.22  | 13227.71  | 16898.76  | 18194.35 | < 0.001 | < 0.001 | ns |
|                                            | (789.55) | (687.93) | (1549.39) | (1065.70) | (1177.10) | (568.77) |         |         |    |

3 **Detritus and roots are the basal resources that provide energy to microbial pathway and root pathway, respectively.** CT, conventional tillage; RT, reduced tillage; NT,  
4 no tillage; Nmin(i→j) indicates the mineral N delivered by the predation of j on i. Two-way ANOVA was used to test the effect of tillage and soil depth on the  
5 variables; when significant interaction occurred, the pairwise differences between CT and RT and NT were tested with Tukey's honestly significant difference at each  
6 soil depth; ns indicates no significant difference ( $P > 0.05$ ); same lowercase letter in the same row and same depth indicates no significant difference among tillage  
7 systems ( $P > 0.05$ ).

8 .

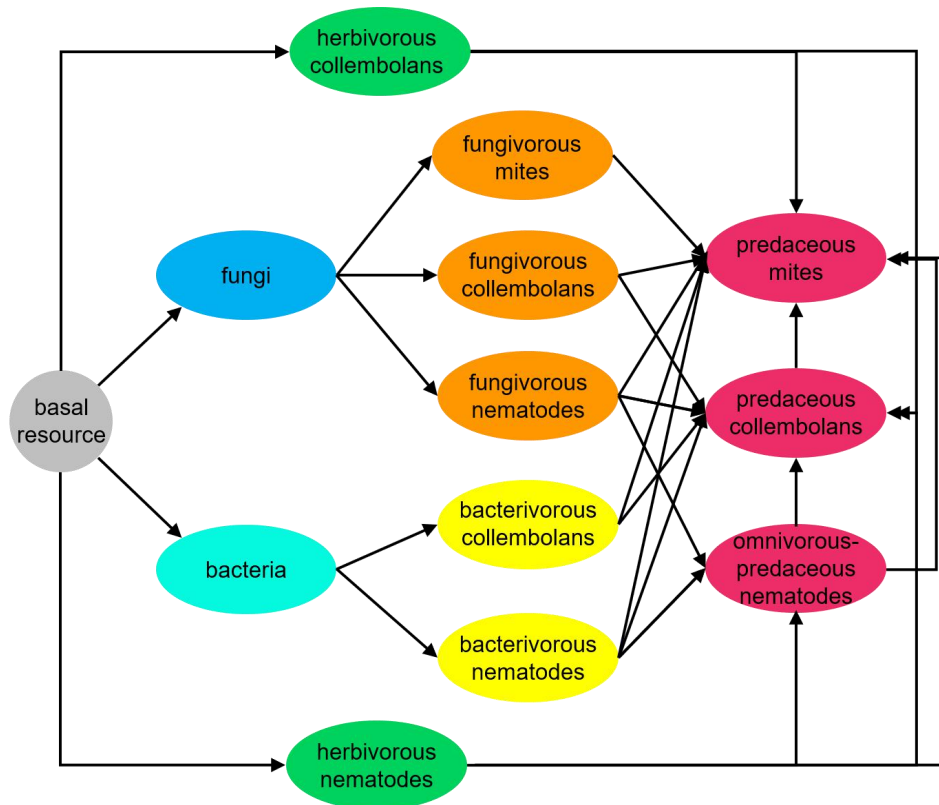

**Figure S1.** Soil food web diagram presenting the feeding relationships among different trophic groups. Omnivorous collembolans were assigned in equal proportions to bacterivorous, fungivorous, herbivorous and predaceous collembolans according to their dietary proportion (de Vries et al., 2013). Colors indicate different feeding guilds: light blue = bacteria, dark blue = fungi, green = herbivorous feeders, yellow = bacterivorous feeders, orange = fungivorous feeders, maroon = predaceous feeders. The gray circle represents basal resources provided by detritus and roots.

## References

- de Vries, F.T., Thébault, E., Liiri, M. Birkhofer, K., Tsiafouli, M.A., Bjørnlund, L., Jørgensen, H.B., Brady, M.V., Christensen, S., de Ruiter, P. C., d'Hertefeldt, T., Frouz, J., Hedlund, K., Hemerik, L., Gera Hol, W.H., Hotes, S., Mortimer, S.R., Setälä, H., Sgardelis, S.P., Uteseny, K., van der Putten, W.H., Wolters, V. and Bardgett, R.D.: Soil food web properties explain ecosystem services across European land use systems, *Proceedings of the National Academy of Sciences*, 110, 14296–14301, doi: 10.1073/pnas.1305198110, 2013.
- de Ruiter, P.C., van Veen, J.A., Moore, J.C. Brussaard, M.L. and Hunt, H.W.: Calculation of nitrogen mineralization in soil food webs, *Plant & Soil*, 157, 263–273, doi: 10.1007/BF00011055, 1993.
- Schwarz, B., Barnes, A.D., Thakur, M.P., Brose, U., Ciobanu, M., Reich, P.B., Rich, R.L., Rosenbaum, B., Stefanski, A and Eisenhauer, N.: Warming alters energetic

structure and function but not resilience of soil food webs, *Nature Climate Change*, 7, 895–900, doi: 10.1038/s41558-017-0002-z, 2017.

Verschoor, B.C.: Carbon and nitrogen budgets of plant-feeding nematodes in grasslands of different productivity, *Applied Soil Ecology*, 20, 15 – 25, doi: 10.1016/S0929-1393(02)00010-0, 2002.
